# Supplementary material for: Factors Associated With Receipt of Adequate Antidepressant Pharmacotherapy by VA Patients With Recurrent Depression
Source: Atypon-hosted journal article supplement (doi:10.1176/ps.62.4.pss6204_0381), 2011-04-01

**Figure 1. Flow chart of the assembly of the sample cohort containing 26,770 veterans with recurrent depression**

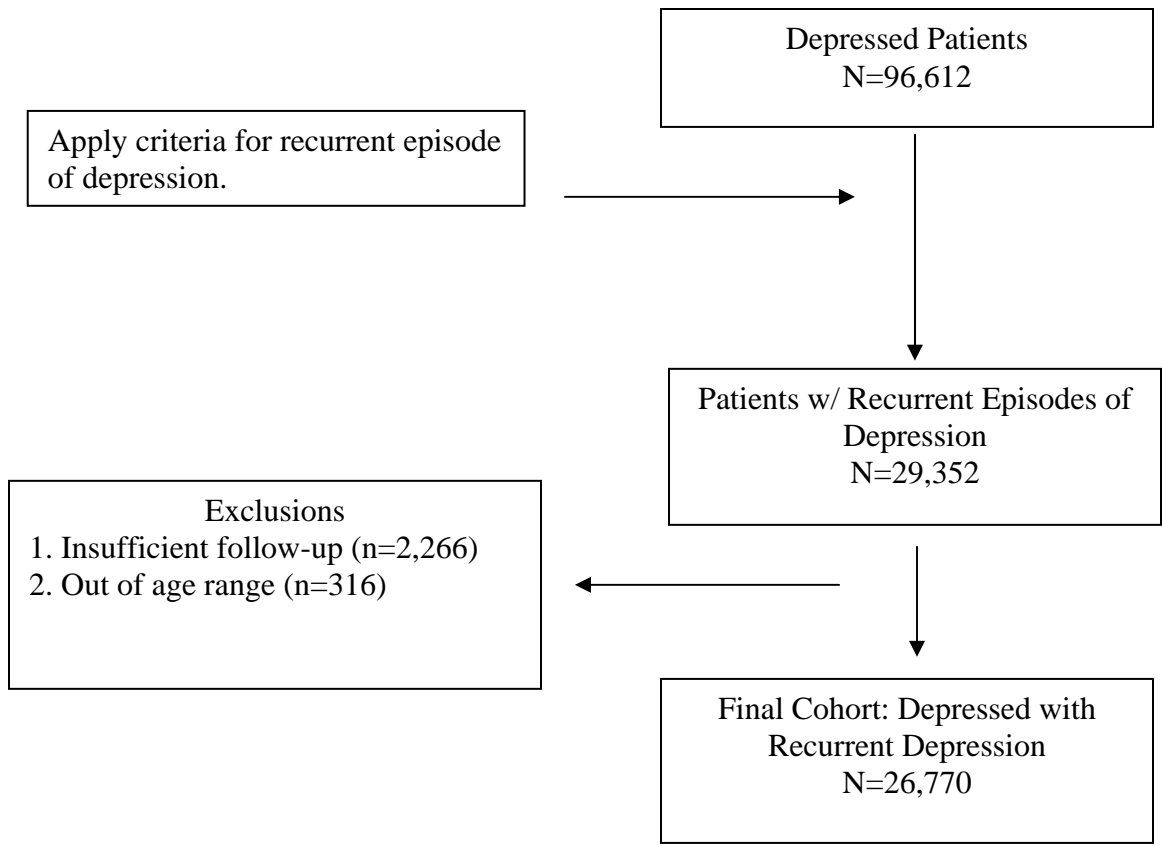

Supplement: garfield_ds.pdf [file garfield_ds.pdf]
